# Supplementary material
Source: publisher figshare collection journal article supplement (https://gsajournals.figshare.com/ndownloader/files/23715614)
Supplement: Supplementary file 1 [file 23715614]

## Sheet: affects response to prenol
					Free-living	Entomopathogenic nematodes (EPNs)				Threadworm	Hookworm	Whipworm
	Chromosome	Gene	Source of Reference	Idenfiers	ortholog gene in pristionchus pacificus	ortholog gene in heterorhabditis bacteriophora	ortholog gene in Steinernema carpocapsae	ortholog gene in Steinernema glaseri	ortholog gene in Steinernema feltiae	ortholog gene in Strongyloides stercoralis	ortholog gene in Necator americanus	ortholog gene in Trichuris trichura
ortholog information	IV	dcap-1	Wormbase Parasite	WBGene00021929	WBGene00095589	no ortholog listed	L596_g22641	L893_g23233	L889_g32794	SSTP_0000256000	NECAME_09832	TTRE_0000031601
ortholog information	IV	dcap-2	Wormbase Parasite	WBGene00003582	WBGene00098452	Hba_17527	L596_g6066	L893_g11113	L889_g31487	SSTP_0000076900	NECAME_05544	no ortholog listed
ortholog information	V	clec-39	Wormbase Parasite	WBGene00012022	no ortholog listed	no ortholog listed	no ortholog listed	L893_g16786	no ortholog listed	no ortholog listed	no ortholog listed	no ortholog listed
ortholog information	X	odr-1	Wormbase Parasite	WBGene00003848	WBGene00107261	Hba_13177	L596_g1328	L893_g1690	L889_g25128	SSTP_0000912800	NECAME_01546	no ortholog listed
ortholog information	V	odr-3	Wormbase Parasite	WBGene00003850	WBGene00103743	Hba_02511	L596_g18547	L893_g25194	L889_g30900	SSTP_0000232900	NECAME_06843	no ortholog listed
ortholog information	V	daf-11	Wormbase Parasite	WBGene00000907	WBGene00104461	Hba_03118	L596_g1433	L893_g18853	L889_g20515	SSTP_0001276100	NECAME_01904	no ortholog listed
ortholog information	I	tax-2	Wormbase Parasite	WBGene00006525	WBGene00096989	Hba_16853	L596_g2281	no ortholog listed	L889_g10817	SSTP_0000626500	no ortholog listed	TTRE_0000213801
ortholog information	III	tax-4	Wormbase Parasite	WBGene00006526	WBGene00091942	Hba_14594	L596_g26746	L893_g13588	L889_g22434	SSTP_0000981000	NECAME_02513	TTRE_0000446501

## Sheet: no affect on response to prenol
					Free-living	Entomopathogenic nematodes (EPNs)				Threadworm	Hookworm	Whipworm
	Chromosome	Gene	Source of Reference	Idenfiers	ortholog gene in pristionchus pacificus	ortholog gene in heterorhabditis bacteriophora	ortholog gene in Steinernema carpocapsae	ortholog gene in Steinernema glaseri	ortholog gene in Steinernema feltiae	ortholog gene in Strongyloides stercoralis	ortholog gene in Necator americanus	ortholog gene in Trichuris trichiura
ortholog information	IV	dod-17	Wormbase Parasite	WBGene00010745	no ortholog listed	no ortholog listed	no ortholog listed	no ortholog listed	no ortholog listed	no ortholog listed	no ortholog listed	TTRE_0000083201
ortholog information	V	srz-103	Wormbase Parasite	WBGene00008815	No orthologs listed for this gene
ortholog information	II	F43G6.6	Wormbase Parasite	WBGene00005013	No orthologs listed for this gene
ortholog information	II	Y62F5A.10	Wormbase Parasite	WBGene00013388	WBGene00092728	Hba_10597	L596_g20316	no ortholog listed	no ortholog listed	SSTP_0000959300	NECAME_03757	no ortholog listed
ortholog information	IV	pgl-1	Wormbase Parasite	WBGene00003992	no ortholog listed	no ortholog listed	no ortholog listed	no ortholog listed	no ortholog listed	no ortholog listed	no ortholog listed	no ortholog listed
ortholog information	III	clk-1	Wormbase Parasite	WBGene00000536	no ortholog listed	Hba_18969	L596_g23956	L893_g15007	L889_g30522	SSTP_0000969600	no ortholog listed	TTRE_0000581001
ortholog information	IV	Y54G2A.12	Wormbase Parasite	WBGene00021877	WBGene00098899	Hba_19104	L596_g21834	L893_g2371	L889_g16142	SSTP_0000397700	NECAME_08611	TTRE_0000458601
ortholog information	V	Srw-43	Wormbase Parasite	WBGene00005790	No orthologs listed for this gene
ortholog information	II	Y17G7B.22	Wormbase Parasite	WBGene00012473	No orthologs listed for this gene
ortholog information	V	srw-54	Wormbase Parasite	WBGene00005801	No orthologs listed for this gene
ortholog information	IV	rab-19	Wormbase Parasite	WBGene00004278	no ortholog listed	Hba_06360	L596_g2061	L893_g17698	L889_g288	SSTP_0000631900	no ortholog listed	TTRE_0000130101
ortholog information	V	Clec-39	Wormbase Parasite	WBGene00012022	no ortholog listed	no ortholog listed	no ortholog listed	L893_g16786	no ortholog listed	no ortholog listed	no ortholog listed	no ortholog listed
ortholog information	V	Srw-36	Wormbase Parasite	WBGene00005783	No orthologs listed for this gene
ortholog information	II	F44E5.3	Wormbase Parasite	WBGene00009690	No orthologs listed for this gene
ortholog information	IV	gcy-18	Wormbase Parasite	WBGene00001543	no otholog listed	Hba_17111	L596_g24186	L893_g3842	L889_g9271	no ortholog listed	no ortholog listed	no ortholog listed
ortholog information	IV	Y39C12A.9	Wormbase Parasite	WBGene00012710	No orthologs listed for this gene
ortholog information	IV	abt-3	Wormbase Parasite	WBGene00000021	No orthologs listed for this gene
ortholog information	III	ZK930.7	Wormbase Parasite	WBGene00014157	No orthologs listed for this gene
ortholog information	IV	nstp-5	Wormbase Parasite	WBGene00014139	WBGene00100053	no ortholog listed	L596_g2390	L893_g28662	L889_g26753	SSTP_0000003300	NECAME_00529	TTRE_0000092801
ortholog information	IV	F52G2.3	Wormbase Parasite	WBGene00009943	No orthologs listed for this gene
ortholog information	X	mir-34	Wormbase Parasite	WBGene00003262	No orthologs listed for this gene
ortholog information	III	F07A11.4	Wormbase Parasite	WBGene00008547	WBGene00108073	no ortholog listed	L596_g12667	L893_g25908	L889_g13368	no ortholog listed	no ortholog listed	TTRE_0000364601
ortholog information	IV	H08M01.1	Wormbase Parasite	WBGene00010373	WBGene00113259	no ortholog listed	no ortholog listed	no ortholog listed	no ortholog listed	no ortholog listed	no ortholog listed	no ortholog listed
ortholog information	IV	wdfy-3	Wormbase Parasite	WBGene00007752	WBGene00276998	Hba_18036	L596_g2419	L893_g10222	no ortholog listed	no ortholog listed	NECAME_10189	no ortholog listed

## Sheet: untested gene candidates
					Free-living	Entomopathogenic nematodes (EPNs)				Threadworm	Hookworm	Whipworm
	Chromosome	Gene	Source of Reference	Idenfiers	ortholog gene in pristionchus pacificus	ortholog gene in heterorhabditis bacteriophora	ortholog gene in Steinernema carpocapsae	ortholog gene in Steinernema glaseri	ortholog gene in Steinernema feltiae	ortholog gene in Strongyloides stercoralis	ortholog gene in Necator americanus	ortholog gene in Trichuris trichura
ortholog information	II	F54D5.7	Wormbase Parasite	WBGene00010052	No ortholog listed	No ortholog listed	L596_g9029	L893_g25604	L889_g6064	SSTP_0000428700	NECAME_08171	No ortholog listed
ortholog information	II	F54D5.24	Wormbase Parasite	WBGene00271798	no orothologs listed for this gene
ortholog information	II	F54D5.17	Wormbase Parasite	WBGene00195146	no orothologs listed for this gene
ortholog information	II	F54D5.15	Wormbase Parasite	WBGene00010057	WBGene00110577	No ortholog listed	No ortholog listed	No ortholog listed	No ortholog listed	No ortholog listed	No ortholog listed	No ortholog listed
ortholog information	II	F07A11.1	Wormbase Parasite	WBGene00008545	WBGene00114774	No ortholog listed	No ortholog listed	No ortholog listed	No ortholog listed	No ortholog listed	No ortholog listed	No ortholog listed
ortholog information	II	kin-6	Wormbase Parasite	WBGene00002194	WBGene00111352	No ortholog listed	L596_g17645	L893_g12650	L889_g11069	SSTP_0000203100	NECAME_07398	No ortholog listed
ortholog information	II	sfxn-1.4	Wormbase Parasite	WBGene00008137	No ortholog listed	No ortholog listed	No ortholog listed	No ortholog listed	No ortholog listed	No ortholog listed	NECAME_03773	TTRE_0000464401
ortholog information	II	C47D12.4	Wormbase Parasite	WBGene00008138	no orothologs listed for this gene
ortholog information	II	F13D12.10	Wormbase Parasite	WBGene00008744	no orothologs listed for this gene
ortholog information	II	F44E5.2	Wormbase Parasite	WBGene00009689	no orothologs listed for this gene
ortholog information	II	F44E5.15	Wormbase Parasite	WBGene00206377	No ortholog listed	No ortholog listed	No ortholog listed	No ortholog listed	No ortholog listed	SSTP_0000427100	No ortholog listed	No ortholog listed
ortholog information	II	patr-1	Wormbase Parasite	WBGene00009661	WBGene00112197	Hba_19654	No ortholog listed	No ortholog listed	No ortholog listed	SSTP_0000908000	No ortholog listed	No ortholog listed
ortholog information	II	hda-5	Wormbase Parasite	WBGene00009663	WBGene00273785	Hba_19655	L596_g10223	L893_g33010	L889_g16508	No ortholog listed	NECAME_04093	No ortholog listed
ortholog information	II	pes-5	Wormbase Parasite	WBGene00003979	no orothologs listed for this gene
ortholog information	II	clec-144	Wormbase Parasite	WBGene00012086	no orothologs listed for this gene
ortholog information	II	npp-3	Wormbase Parasite	WBGene00003789	WBGene00273589	Hba_21200	L596_g27607	L893_g31478	L889_g29504	SSTP_0000172900	NECAME_17598	TTRE_0000522401
ortholog information	II	top-2	Wormbase Parasite	WBGene00010785	No ortholog listed	Hba_16776	L596_g1451	L893_g21291	L889_g2178	SSTP_0000011200	No ortholog listed	No ortholog listed
ortholog information	II	ZK930.5	Wormbase Parasite	WBGene00014155	no orothologs listed for this gene
ortholog information	II	ZK930.6	Wormbase Parasite	WBGene00014156	No ortholog listed	No ortholog listed	No ortholog listed	L893_g14466	L889_g29476	No ortholog listed	No ortholog listed	TTRE_0000825201
ortholog information	II	vab-23	Wormbase Parasite	WBGene00014153	WBGene00117582	No ortholog listed	L596_g15503	L893_g11479	L889_g27498	SSTP_0000438700	NECAME_17056	TTRE_0000242801
ortholog information	II	mex-1	Wormbase Parasite	WBGene00003228	WBGene00097014	No ortholog listed	L596_g12559	L893_g22670	L889_g30114	SSTP_0001145800	NECAME_06419	No ortholog listed
ortholog information	II	ash-2	Wormbase Parasite	WBGene00012458	WBGene00097784	Hba_17557	L596_g11226	L893_g27634	L889_g11470	SSTP_0000815100	No ortholog listed	TTRE_0000384101
ortholog information	II	Y17G7B.23	Wormbase Parasite	WBGene00044030	WBGene00097786	No ortholog listed	No ortholog listed	No ortholog listed	No ortholog listed	No ortholog listed	No ortholog listed	No ortholog listed
ortholog information	IV	sru-17	Wormbase Parasite	WBGene00005680	no orothologs listed for this gene
ortholog information	IV	cul-6	Wormbase Parasite	WBGene00000841	No ortholog listed	No ortholog listed	L596_g3445	L893_g20318	L889_g12193	SSTP_0000222200	NECAME_17028	TTRE_0000360001
ortholog information	IV	T23B5.4	Wormbase Parasite	WBGene00011941	No ortholog listed	Hba_06299	L596_g14772	L893_g26791	L889_g23722	SSTP_0001001000	No ortholog listed	No ortholog listed
ortholog information	IV	ZK897.10	Wormbase Parasite	WBGene00206520	no orothologs listed for this gene
ortholog information	IV	F07C6.6	Wormbase Parasite	WBGene00045067	no orothologs listed for this gene
ortholog information	IV	ZK896.1	Wormbase Parasite	WBGene00014132	No ortholog listed	No ortholog listed	No ortholog listed	No ortholog listed	No ortholog listed	No ortholog listed	No ortholog listed	TTRE_0000083201
ortholog information	IV	ZK896.5	Wormbase Parasite	WBGene00014136	No ortholog listed	No ortholog listed	No ortholog listed	No ortholog listed	No ortholog listed	No ortholog listed	No ortholog listed	TTRE_0000083201
ortholog information	IV	ZK896.4	Wormbase Parasite	WBGene00014135	No ortholog listed	No ortholog listed	No ortholog listed	No ortholog listed	No ortholog listed	No ortholog listed	No ortholog listed	TTRE_0000083201
ortholog information	IV	K08D8.12	Wormbase Parasite	WBGene00194926	no orothologs listed for this gene
ortholog information	IV	K08D8.11	Wormbase Parasite	WBGene00194925	no orothologs listed for this gene
ortholog information	IV	K08D8.9	Wormbase Parasite	WBGene00194918	no orothologs listed for this gene
ortholog information	IV	K08D8.3	Wormbase Parasite	WBGene00010657	No ortholog listed	No ortholog listed	No ortholog listed	No ortholog listed	No ortholog listed	No ortholog listed	No ortholog listed	TTRE_0000083201
ortholog information	IV	K08D8.5	Wormbase Parasite	WBGene00010659	No ortholog listed	No ortholog listed	No ortholog listed	No ortholog listed	No ortholog listed	No ortholog listed	No ortholog listed	WBGene00289432
ortholog information	IV	irg-6	Wormbase Parasite	WBGene00007864	No ortholog listed	No ortholog listed	No ortholog listed	No ortholog listed	No ortholog listed	No ortholog listed	No ortholog listed	TTRE_0000083201
ortholog information	IV	srz-15	Wormbase Parasite	WBGene00007865	no orothologs listed for this gene
ortholog information	IV	C32H11.3	Wormbase Parasite	WBGene00007866	No ortholog listed	No ortholog listed	No ortholog listed	No ortholog listed	No ortholog listed	No ortholog listed	No ortholog listed	TTRE_0000083201
ortholog information	IV	C32H11.6	Wormbase Parasite	WBGene00007869	no orothologs listed for this gene
ortholog information	IV	dct-19	Wormbase Parasite	WBGene00007876	No ortholog listed	No ortholog listed	No ortholog listed	No ortholog listed	No ortholog listed	No ortholog listed	No ortholog listed	WBGene00289432
ortholog information	IV	F55G11.10	Wormbase Parasite	WBGene00010129	no orothologs listed for this gene
ortholog information	IV	F55G11.3	Wormbase Parasite	WBGene00014771	no orothologs listed for this gene
ortholog information	IV	K10D11.2	Wormbase Parasite	WBGene00010746	No ortholog listed	No ortholog listed	No ortholog listed	No ortholog listed	No ortholog listed	No ortholog listed	No ortholog listed	TTRE_0000083201
ortholog information	IV	K10D11.3	Wormbase Parasite	WBGene00010747	No ortholog listed	No ortholog listed	No ortholog listed	No ortholog listed	No ortholog listed	No ortholog listed	No ortholog listed	TTRE_0000083201
ortholog information	IV	K10D11.4	Wormbase Parasite	WBGene00010748	No ortholog listed	No ortholog listed	No ortholog listed	No ortholog listed	No ortholog listed	No ortholog listed	No ortholog listed	TTRE_0000083201
ortholog information	IV	F49E11.7	Wormbase Parasite	WBGene00009893	WBGene00107919	No ortholog listed	L596_g11788	L893_g21458	L889_g20494	SSTP_0000510300	NECAME_05538	No ortholog listed
ortholog information	IV	scl-2	Wormbase Parasite	WBGene00009895	No ortholog listed	No ortholog listed	L596_g18522	L893_g30866	L889_g17083	No ortholog listed	NECAME_01366	TTRE_0000107101
ortholog information	IV	scl-4	Wormbase Parasite	WBGene00008026	no orothologs listed for this gene
ortholog information	IV	scl-7	Wormbase Parasite	WBGene00008029	No ortholog listed	No ortholog listed	L596_g18522	L893_g30866	L889_g17083	No ortholog listed	NECAME_01369	TTRE_0000107101
ortholog information	IV	dli-1	Wormbase Parasite	WBGene00001007	WBGene00101503	Hba_19525	L596_g11084	L893_g19031	L889_g17210	SSTP_0000690900	NECAME_13893	TTRE_0000506001
ortholog information	IV	rde-11	Wormbase Parasite	WBGene00023421	no orothologs listed for this gene
ortholog information	IV	F09E8.2	Wormbase Parasite	WBGene00008624	Hba_03711	No ortholog listed	L596_g11272	L893_g27299	L889_g5766	SSTP_0000466900	No ortholog listed	TTRE_0000122601
ortholog information	IV	msh-5	Wormbase Parasite	WBGene00003421	No ortholog listed	Hba_07821	L596_g14165	L893_g13527	L889_g18463	SSTP_0001145900	NECAME_06096	TTRE_0000003701
ortholog information	IV	scl-14	Wormbase Parasite	WBGene00008625	No ortholog listed	No ortholog listed	No ortholog listed	No ortholog listed	No ortholog listed	SSTP_0000301900	NECAME_06919	TTRE_0000107101
ortholog information	IV	F58D2.3	Wormbase Parasite	WBGene00044978	no orothologs listed for this gene
ortholog information	IV	F58D2.2	Wormbase Parasite	WBGene00010241	no orothologs listed for this gene
ortholog information	IV	C48D1.1	Wormbase Parasite	WBGene00008177	no orothologs listed for this gene
ortholog information	IV	C48D1.9	Wormbase Parasite	WBGene00194643	no orothologs listed for this gene
ortholog information	IV	JC8.7	Wormbase Parasite	WBGene00010439	No ortholog listed	No ortholog listed	L596_g3364	L893_g15893	L889_g4764	No ortholog listed	NECAME_11467	No ortholog listed
ortholog information	IV	ttr-51	Wormbase Parasite	WBGene00010440	No ortholog listed	No ortholog listed	L596_g22753	L893_g24779	L889_g32684	SSTP_0000110700	NECAME_17477	TTRE_0000115201
ortholog information	IV	Y67H2A.2	Wormbase Parasite	WBGene00013461	No ortholog listed	No ortholog listed	L596_g19311	No ortholog listed	No ortholog listed	No ortholog listed	No ortholog listed	No ortholog listed
ortholog information	IV	Y67H2A.7	Wormbase Parasite	WBGene00013464	WBGene00113363	Hba_16353	L596_g668	L889_g18213	L889_g18212	SSTP_0000236000	NECAME_02371	TTRE_0000241501
ortholog information	IV	Y67H2A.9	Wormbase Parasite	WBGene00014941	no orothologs listed for this gene
ortholog information	IV	Y62E10A.13	Wormbase Parasite	WBGene00013379	WBGene00093733	No ortholog listed	L596_g10824	L893_g14139	L889_g18335	SSTP_0000846500	No ortholog listed	TTRE_0000431401
ortholog information	IV	cyp-31A5	Wormbase Parasite	WBGene00013381	WBGene00101285	Hba_01227	No ortholog listed	No ortholog listed	L889_g29483	No ortholog listed	No ortholog listed	No ortholog listed
ortholog information	IV	K09B11.4	Wormbase Parasite	WBGene00010711	no orothologs listed for this gene
ortholog information	IV	rsd-2	Wormbase Parasite	WBGene00004681	no orothologs listed for this gene
ortholog information	IV	srd-10	Wormbase Parasite	WBGene00005088	WBGene00280184	No ortholog listed	No ortholog listed	No ortholog listed	No ortholog listed	No ortholog listed	NECAME_09409	No ortholog listed
ortholog information	IV	Y45F10B.8	Wormbase Parasite	WBGene00012872	no orothologs listed for this gene
ortholog information	IV	sru-16	Wormbase Parasite	WBGene00005679	no orothologs listed for this gene
ortholog information	IV	Y45F10B.12	Wormbase Parasite	WBGene00012874	no orothologs listed for this gene
ortholog information	IV	sru-9	Wormbase Parasite	WBGene00005672	no orothologs listed for this gene
ortholog information	IV	Y45F10B.3	Wormbase Parasite	WBGene00012871	no orothologs listed for this gene
ortholog information	IV	Y45F10B.59	Wormbase Parasite	WBGene00194917	no orothologs listed for this gene
ortholog information	IV	Y45F10B.15	Wormbase Parasite	WBGene00012876	no orothologs listed for this gene
ortholog information	IV	Y45F10B.18	Wormbase Parasite	WBGene00045059	no orothologs listed for this gene
ortholog information	IV	C08F11.3	Wormbase Parasite	WBGene00007452	no orothologs listed for this gene
ortholog information	IV	fbxa-98	Wormbase Parasite	WBGene00007453	no orothologs listed for this gene
ortholog information	IV	C08F11.7	Wormbase Parasite	WBGene00007454	no orothologs listed for this gene
ortholog information	IV	srz-29	Wormbase Parasite	WBGene00007456	no orothologs listed for this gene
ortholog information	IV	C08F11.10	Wormbase Parasite	WBGene00007457	no orothologs listed for this gene
ortholog information	IV	oac-48	Wormbase Parasite	WBGene00011960	No ortholog listed	Hba_10854	No ortholog listed	No ortholog listed	No ortholog listed	No ortholog listed	No ortholog listed	No ortholog listed
ortholog information	IV	T23G4.5	Wormbase Parasite	WBGene00011961	no orothologs listed for this gene
ortholog information	IV	T23G4.127	Wormbase Parasite	WBGene00219243	no orothologs listed for this gene
ortholog information	IV	C47A4.1	Wormbase Parasite	WBGene00008122	WBGene00284484	Hba_06345	No ortholog listed	L893_g20046	L889_g539	SSTP_0000690100	NECAME_04134	No ortholog listed
ortholog information	IV	gly-10	Wormbase Parasite	WBGene00001635	WBGene00101275	Hba_06338	L596_g3062	L893_g3524	L889_g27129	SSTP_0001240500	NECAME_04001	TTRE_0000434701
ortholog information	IV	Y45F10D.7	Wormbase Parasite	WBGene00012887	WBGene00093800	Hba_21407	L596_g14453	L893_g20398	L889_g153	SSTP_0000319900	NECAME_04979	No ortholog listed

## Sheet: AWC neuron genes
					Free-living	Entomopathogenic nematodes (EPNs)				Threadworm	Hookworm	111
	Chromosome	Gene	Source of Reference	Idenfiers	ortholog gene in pristionchus pacificus	ortholog gene in heterorhabditis bacteriophora	ortholog gene in Steinernema carpocapsae	ortholog gene in Steinernema glaseri	ortholog gene in Steinernema feltiae	ortholog gene in Strongyloides stercoralis	ortholog gene in Necator americanus	ortholog gene in Trichuris trichura
ortholog information	V	daf-11	Wormbase Parasite	WBGene00000907	WBGene00104461	Hba_03118	L596_g1433	L893_g18853	L889_g20515	SSTP_0001276100	NECAME_01904	No ortholog listed
ortholog information	I	tax-2	Wormbase Parasite	WBGene00006525	WBGene00096989	No ortholog listed	L596_g2281	No ortholog listed	L889_g10817	SSTP_0000626500	No ortholog listed	TTRE_0000213801
ortholog information	X	odr-1	Wormbase Parasite	WBGene00003848	WBGene00107261	No ortholog listed	L596_g1328	L893_g1690	L889_g25128	SSTP_0000912800	NECAME_01546	No ortholog listed
ortholog information	III	tax-4	Wormbase Parasite	WBGene00006526	WBGene00091942	Hba_14594	L596_g26746	L889_g22434	L889_g22438	SSTP_0000981000	NECAME_02513	TTRE_0000446501
ortholog information	V	odr-3	Wormbase Parasite	WBGene00003850	WBGene00103743	Hba_02511	L596_g18547	L893_g25194	L889_g30900	SSTP_0000232900	NECAME_06843	No ortholog listed
ortholog information	IV	odr-8	Wormbase Parasite	WBGene00018160	WBGene00106712	No ortholog listed	L596_g2955	L893_g28435	L889_g4427	SSTP_0001276800	NECAME_17083	TTRE_0000063001
ortholog information	III	odr-4	Wormbase Parasite	WBGene00003851	WBGene00275875	No ortholog listed	L596_g9933	L893_g12496	L889_g24235	No ortholog listed	NECAME_09322	No ortholog listed
ortholog information	X	gpa-5	Wormbase Parasite	WBGene00001667	No ortholog listed	No ortholog listed	No ortholog listed	No ortholog listed	No ortholog listed	No ortholog listed	NECAME_01571	No ortholog listed
ortholog information	V	str-2	Wormbase Parasite	WBGene00006070	no orothologs listed for this gene
ortholog information	V	gpa-13	Wormbase Parasite	WBGene00001675	WBGene00103522	Hba_18651	L596_g10407	L893_g480	L889_g25069	SSTP_0001276500	NECAME_08037	No ortholog listed
ortholog information	V	gpa-3	Wormbase Parasite	WBGene00001665	no orothologs listed for this gene
ortholog information	V	gpa-2	Wormbase Parasite	WBGene00001664	WBGene00091622	Hba_18744	L596_g26360	L893_g31284	L889_g1103	SSTP_0000415600	NECAME_07779	No ortholog listed
ortholog information	X	odr-7	Wormbase Parasite	WBGene00003854	No ortholog listed	No ortholog listed	L596_g18571	L893_g9511	No ortholog listed	SSTP_0000225800	No ortholog listed	No ortholog listed
